# Supplementary material for: How embryos escape from danger: the mechanism of rapid, plastic hatching in red-eyed treefrogs
Source: Oxford University Press journal article supplement (doi:10.1242/jeb.139519), 2016-06-15
Supplement: jeb139519supp.pdf [file jeb139519supp.pdf]

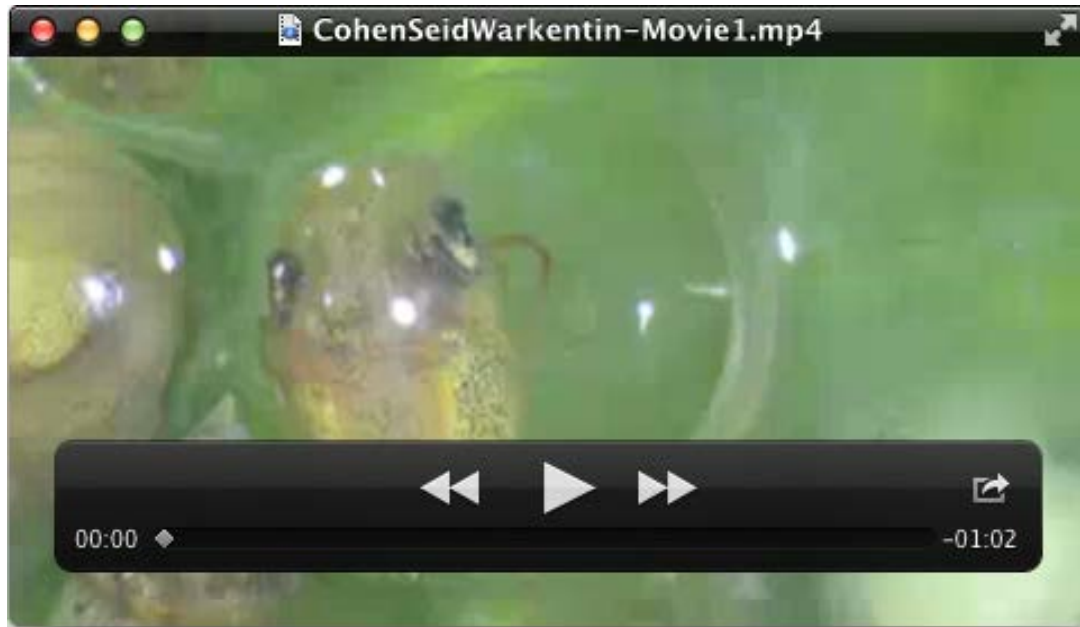

Movie 1. Experimental rotation of *Agalychnis callidryas* embryo during hatching. The embryo is stimulated to hatch using a moistened, blunt probe. After it shakes for several seconds, the embryo is rotated to a new position. A fluid leak forms at the original location of the embryo's snout, and the egg capsule shrinks slightly, indicating loss of turgor, but does not collapse completely; its tail may block further leakage. The embryo then digests a second hole in the membrane and exits through it. The embryo is 5 days old; video was recorded and plays in real time.

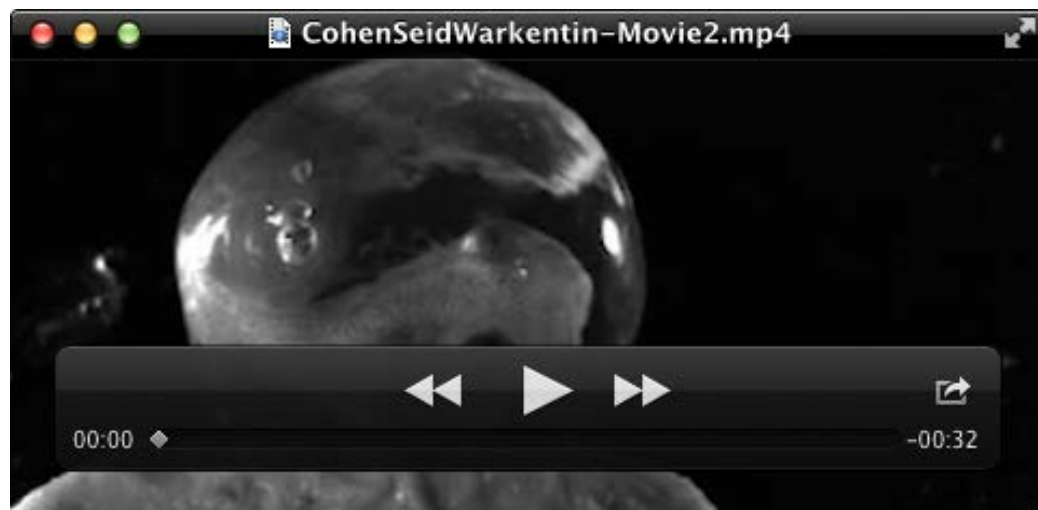

Movie 2. *Agalychnis callidryas* hatching. The embryo shakes briefly and gapes, without pressing its snout against the membrane, then a leak forms. The embryo passively slides forward so its snout protrudes, thrashes briefly so its head emerges, pauses, and thrashes again to complete its exit. The embryo is 5 days old; video was recorded at 200 Hz and plays here in real time.

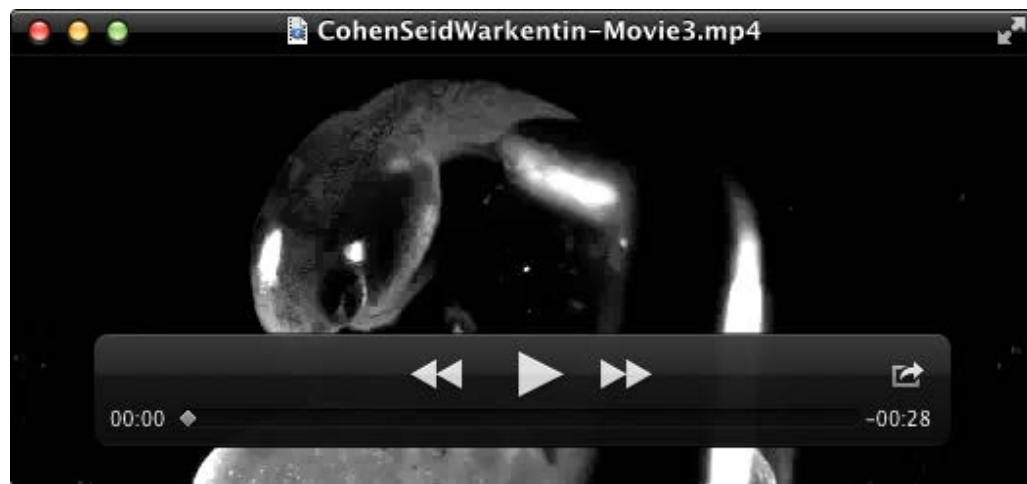

Movie 3. *Agalychnis callidryas* hatching. The embryo shakes continuously, pressing its snout against the membrane and gaping once. The snout protrudes slightly, a small amount of fluid leaks, and the snout protrudes further. The embryo continues shaking, pushing forward then, after one eye is free, amplifies its motions to exit in burst of continuous thrashing. The embryo is 5 days old; video was recorded at 200 Hz and plays here at 100 Hz (half-speed).
